# Supplementary material for: Moment closure based parameter inference of stochastic kinetic models
Source: Springer Nature journal article supplement (doi:10.1007/s11222-011-9310-8), 2012-01-09
Supplement: 11222_2011_9310_MOESM1_ESM.pdf [file 11222_2011_9310_MOESM1_ESM.pdf]

## SUPPLEMENTAL MATERIAL

### Moment closure based parameter inference of stochastic kinetic models

*Authors:*

Peter MILNER, Colin S. GILLESPIE and Darren J. WILKINSON

## S.1 Updating the latent predator state

To update the latent predator state  $Y_2$ , we use a Metropolis-Hastings step. We first initialise the unobserved data to a valid sample path from the set of all plausible sample paths, for this problem we sampled from a uniform  $U(1, 500)$  to initialise the latent data points. To update the data we use the following algorithm for each unobserved data point  $Y_2(t_i)$ :

1. Propose

$$Y_2(t_i|t_{i-1}, t_{i+1})^* \sim N(\mu_i^\dagger, \sigma_i^\dagger) \quad (1)$$

where

$$\mu_i^\dagger = \frac{1}{2}[Y_2(t_{i-1}) + Y_2(t_{i+1})] \quad \text{and} \quad \sigma_i^\dagger = \frac{1}{2}\text{Var}[Y_2(t_i)] .$$

Since our observations are on a regularly spaced grid, this proposal uses the average of the neighbouring data points. If observations were irregularly spaced, then we could use a simple linear interpolation scheme. The value  $\text{Var}[Y_2(t_i)]$  is estimated from the the moment equations for time  $t_{i-1}$ .

2. Accept  $Y_2(t_i)^*$  with probability  $\alpha = \min\{1, a\}$  where

$$a = \frac{\pi[Y_2(t_i)^* | Y_2(t_{i-1}), Y_2(t_{i+1})]}{\pi[Y_2(t_i) | Y_2(t_{i-1}), Y_2(t_{i+1})]} \times \frac{q[Y_2(t_i) | Y_2(t_{i-1}), Y_2(t_{i+1})]}{q[Y_2(t_i)^* | Y_2(t_{i-1}), Y_2(t_{i+1})]}$$

where

$$\begin{aligned} \pi[Y_2(t_i)^* | Y_2(t_{i-1}), Y_2(t_{i+1})] &= p[Y_2(t_i)^* | Y_2(t_{i-1})] p[Y_2(t_{i+1}) | Y_2(t_i)^*] \\ &= \phi(Y_2(t_i)^*; \psi_{i-1}, \Sigma_{i-1}) \phi(Y_2(t_{i+1}); \psi_i^*, \Sigma_i^*) \end{aligned}$$

and

$$q[Y_2(t_i) | Y_2(t_{i-1}), Y_2(t_{i+1})] = \phi(Y_2(t_i); \mu_i^\dagger, \sigma_i^\dagger) .$$

## S.2 Prokaryotic auto regulatory gene network

This is a simple model of a prokaryotic auto regulation network taken from Golightly and Wilkinson, 2006. It contains twelve reactions and six species. In this model a protein  $I$  coded for by a gene  $i$  represses its own transcription and also the transcription of another gene,  $g$  by binding to a regulatory region upstream of the gene. This can be simplified to the following reactions

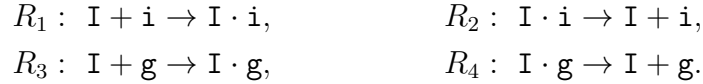

The transcription of  $i$  and  $g$  and the translation of mRNA  $r_i$  and  $r_g$  are represented by

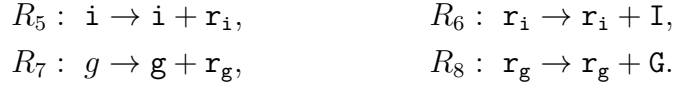

We also have mRNA degradation

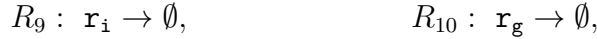

and protein degradation

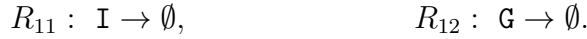

Each reaction  $i$  has a stochastic rate constant  $c_i$ . There are two conservation laws in the model

$$I \cdot i + i = K_1, \quad I \cdot g + g = K_2,$$

where  $K_1$  and  $K_2$  are conservation constants. If  $K_1$  and  $K_2$  are known, then we can simplify the model using the conservation laws to remove  $I \cdot i$  and  $I \cdot g$ . This simplification reduces the model to six dimensions

$$\mathbf{y} = (I, G, i, g, r_i, r_g)^\top.$$

The reaction hazards for  $R_1$  and  $R_2$  are  $h_1(\mathbf{y}, c_1) = c_1 I i$  and  $h_2(\mathbf{y}, c_2) = c_2 I \cdot i = c_2(K_1 - i)$  respectively. Hazards for  $R_3$  and  $R_4$  are calculated similarly. The remaining hazards are first order reactions.

The CME for the auto regulatory gene network is

$$\frac{d}{dt}p(\mathbf{y}; t) = \sum_{i=1}^{12} \{h_i(\mathbf{y} - A_i^\top, c_i)p(\mathbf{y} - A_i^\top; t) - h_i(\mathbf{y}, c_i)p(\mathbf{y}; t)\}, \quad (2)$$

where

$$A^T = \begin{pmatrix} -1 & 1 & -1 & 1 & 0 & 1 & 0 & 0 & 0 & 0 & -1 & 0 \\ 0 & 0 & 0 & 0 & 0 & 0 & 0 & 1 & 0 & 0 & 0 & -1 \\ 0 & 0 & 1 & -1 & 0 & 0 & 0 & 0 & 0 & 0 & 0 & 0 \\ 0 & 0 & -1 & 1 & 0 & 0 & 0 & 0 & 0 & 0 & 0 & 0 \\ 0 & 0 & 0 & 0 & 1 & 0 & 0 & 0 & -1 & 0 & 0 & 0 \\ 0 & 0 & 0 & 0 & 0 & 0 & 1 & 0 & 0 & -1 & 0 & 0 \end{pmatrix}.$$

$A$  is known as the reaction matrix and each column of is  $\mathbf{s}_L$ . See section 2.1 of the main paper for further details.

Multiplying equation (2) by the generating function (3) and extracting coefficients of  $\theta$  gives the moment equations. Assuming an underlying Gaussian distribution gives us a closed set of twenty-seven ODEs. Six ODEs for the means, six ODEs for the variances and fifteen ODEs for the covariance terms.
